# Supplementary material for: The methylome of the marbled crayfish links gene body methylation to stable expression of poorly accessible genes
Source: PubMed Central journal article supplement (PMC6172769; doi:10.1186/s13072-018-0229-6), 2018-10-04
Supplement: 13072_2018_229_MOESM2_ESM.pdf [file 13072_2018_229_MOESM2_ESM.pdf]

Whole-genome bisulfite sequencing details.

| ID     | species                   | tissue | source                 | mapping % | conv. % | genome coverage | % CpGs covered | seq.  |
|--------|---------------------------|--------|------------------------|-----------|---------|-----------------|----------------|-------|
| Pvir#2 | <i>P. virginalis</i>      | hep.   | lab stock              | 55        | 99.7    | 9.8x            | 79             | PE100 |
| Pvir#3 | <i>P. virginalis</i>      | hep.   | Moosweiher (Germany)   | 53        | 99.8    | 8.8x            | 76             | PE100 |
| Pvir#6 | <i>P. virginalis</i>      | hep.   | lab stock              | 52        | 99.2    | 11.4x           | 77             | PE100 |
| Pvir#2 | <i>P. virginalis</i>      | musc.  | lab stock              | 45        | 99.6    | 23.4x           | 87             | PE150 |
| Pvir#3 | <i>P. virginalis</i>      | musc.  | Moosweiher (Germany)   | 50        | 99.5    | 20.4x           | 85             | PE150 |
| Mora   | <i>P. virginalis</i>      | musc.  | Moramanga (Madagascar) | 26        | 99.3    | 13.8x           | 80             | PE150 |
| E1.7   | <i>P. virginalis</i>      | E1.7   | lab stock              | 33        | 99.7    | 15.2x           | 81             | PE150 |
| hem    | <i>P. virginalis</i>      | hemo.  | Reilingen (Germany)    | 27        | 99.1    | 17.9x           | 81             | PE150 |
| Pfal#3 | <i>P. fallax</i> (female) | hep.   | aquarium supply        | 50        | 99.9    | 10.8x           | 68             | PE100 |
| Pfal#4 | <i>P. fallax</i> (female) | hep.   | aquarium supply        | 51        | 99.5    | 10.2x           | 67             | PE100 |
| Pfal#4 | <i>P. fallax</i> (female) | musc.  | aquarium supply        | 52        | 99.5    | 10.8x           | 67             | PE100 |

Abbreviations: hep.: hepatopancreas, musc.: abdominal musculature, E1.7: embryonic stage 1.7, hemo.: hemolymph, conv.: conversion, seq.: sequencing protocol, PE: paired-end.

Baseline mapping ratios are around 50%, due to the high fragmentation level of the reference genome. Lower mapping ratios in some of the samples are due to concomitantly sequenced bacterial DNA. Lab stocks and wild catches from Moosweiher have been described in Vogt et al., *Biology Open* 2015, 4(11):1583-1594.
