# Supplementary material for: The methylome of the marbled crayfish links gene body methylation to stable expression of poorly accessible genes
Source: PubMed Central journal article supplement (PMC6172769; doi:10.1186/s13072-018-0229-6), 2018-10-04

LINEs  
(N=25,622)

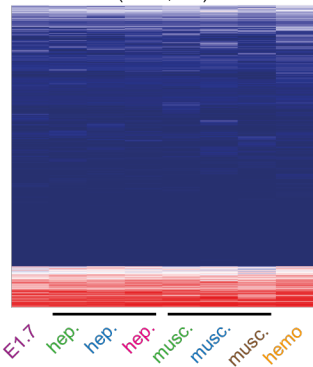

SINEs  
(N=14,821)

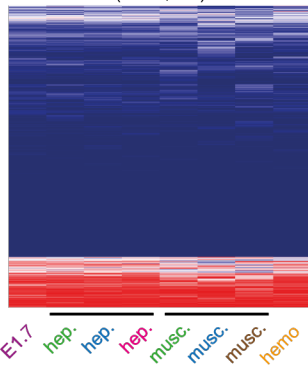

DNA transposons  
(N=7,144)

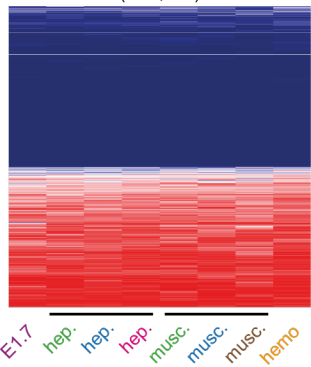

LTRs  
(N=6,483)

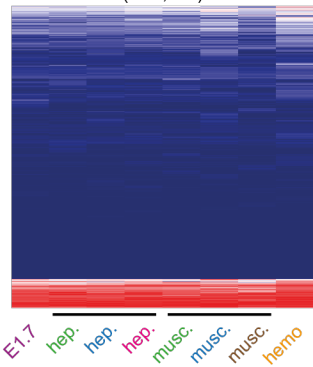

TcMar-Tigger  
(N=2,416)

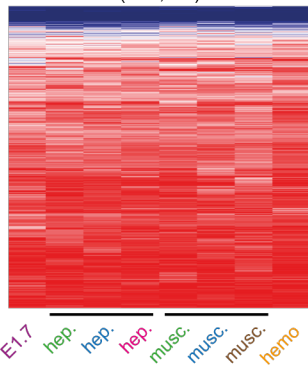

rRNAs  
(N=198)

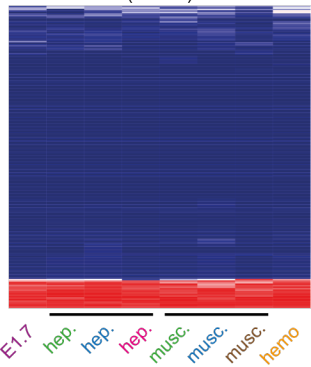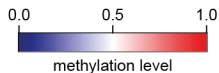

Supplement: 13072_2018_229_MOESM5_ESM.pdf [file 13072_2018_229_MOESM5_ESM.pdf]
