# Supplementary material for: The methylome of the marbled crayfish links gene body methylation to stable expression of poorly accessible genes
Source: PubMed Central journal article supplement (PMC6172769; doi:10.1186/s13072-018-0229-6), 2018-10-04
Supplement: 13072_2018_229_MOESM8_ESM.pdf [file 13072_2018_229_MOESM8_ESM.pdf]

ATAC-seq details.

| ID   | species              | tissue    | yield [Mbp] | % mapping | seq.  |
|------|----------------------|-----------|-------------|-----------|-------|
| hem1 | <i>P. virginalis</i> | hemocytes | 12,717      | 78        | PE125 |
| hem2 | <i>P. virginalis</i> | hemocytes | 10,849      | 73        | PE125 |
| hem3 | <i>P. virginalis</i> | hemocytes | 6,423       | 62        | PE125 |

seq.: sequencing protocol
