# Supplementary material for: The methylome of the marbled crayfish links gene body methylation to stable expression of poorly accessible genes
Source: PubMed Central journal article supplement (PMC6172769; doi:10.1186/s13072-018-0229-6), 2018-10-04

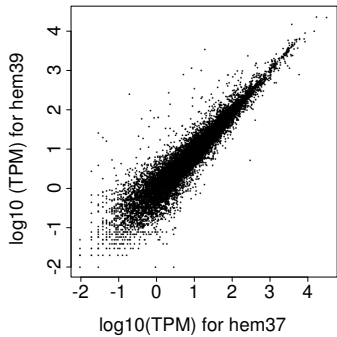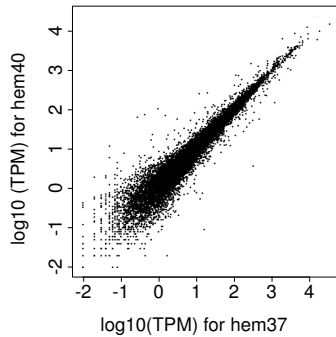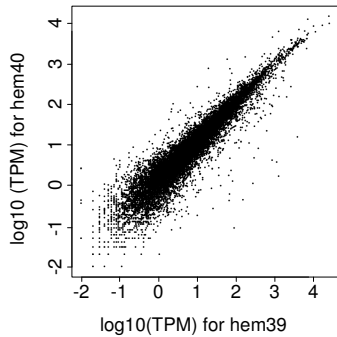

Supplement: 13072_2018_229_MOESM10_ESM.pdf [file 13072_2018_229_MOESM10_ESM.pdf]
